# Supplementary material
Source: PubMed Central journal article supplement (PMC5340686)
Supplement: ajtr0009-0507-f6.pdf [file ajtr0009-0507-f6.pdf]

## AGR2 promotes proliferation, migration and EMT in AdCC

**Supplementary Table 1.** Primer sequences in this study

| Gene       | Forward Primer (5' to 3') | Reverse Primer (5' to 3') |
|------------|---------------------------|---------------------------|
| AGR2       | GTCAGCATTCTTGCTCCTTGT     | GGGTCGAGAGTCCTTTGTGTC     |
| CD147      | GAAGTCGTCAGAACACATCAACG   | TTCCGGCGCTTCTCGTAGA       |
| E-cadherin | CGAGAGCTACACGTTACCGG      | GGGTGTCGAGGGAAAAATAGG     |
| N-cadherin | AGCCAACCTTAAGTGGAGGAGT    | GGCAAGTTGATTGGAGGGATG     |
| Snail      | TCGGAAGCCTAACTACAGCGA     | AGATGAGCATTGGCAGCGAG      |
| Slug       | CGAACTGGACACACATACAGTG    | CTGAGGATCTCTGTTGTGTT      |
| Survivin   | AGGACCACCGCATCTCTACAT     | AAGTCTGGCTCGTTCTCAGTG     |
| Cyclin D1  | GCTGCGAAGTGGAACCATC       | CCTCCTTCTGCACACATTTGAA    |

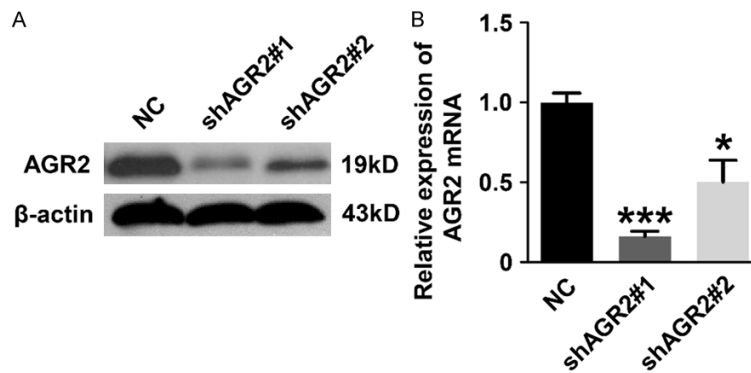

**Supplementary Figure 1.** Inhibition efficacy of AGR2 by specific shRNA. A. The protein levels of AGR2 in SACC-LM cell transfected with negative control shRNA (NC), AGR2 shRNA#1 (shAGR2#1) and AGR2 shRNA#2 (shAGR2#2). B. The mRNA levels of AGR2 in SACC-LM cell transfected with negative control shRNA (NC), AGR2 shRNA#1 (shAGR2#1) and AGR2 shRNA#2 (shAGR2#2, Mean  $\pm$  SEM, \* $P$ <0.05, \*\*\* $P$ <0.001, unpaired t test).
